# Supplementary material for: phoP maintains the environmental persistence and virulence of pathogenic bacteria in mechanically stressed desiccated droplets
Source: PubMed Central journal article supplement (PMC10164896; doi:10.1016/j.isci.2023.106580), 2023-04-08
Supplement: mmc1.pdf [file mmc1.pdf]

iScience, Volume 26

**Supplemental information**

***phoP* maintains the environmental persistence  
and virulence of pathogenic bacteria  
in mechanically stressed desiccated droplets**

**Vishnu Hariharan, Atish Roy Chowdhury, Srinivas Rao S, Dipshikha  
Chakravortty, and Saptarshi Basu**

## Supplementary materials

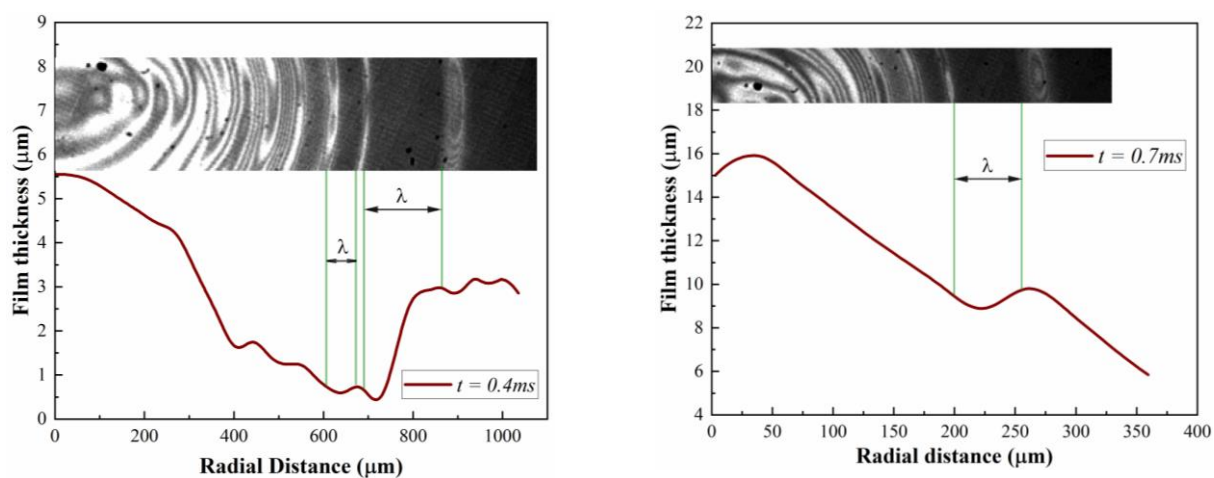

**Figure S1 Variation of thin-film layer thickness and capillary wavelengths**

Variation of film-thickness for time instants from 0.3 to 3.8 ms and Film thickness and observance of capillary waves at time instants of 0.4 and 0.7 ms. (Relates to **Figure 2B**)

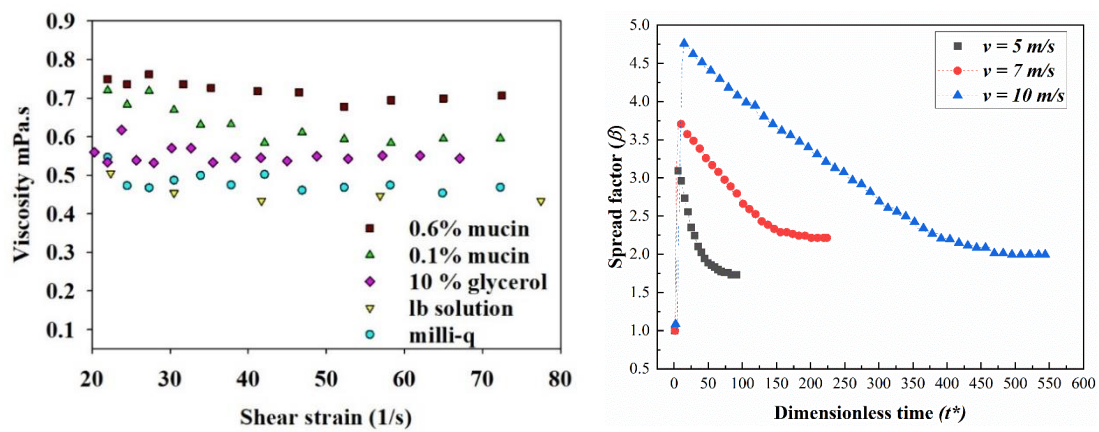

**Figure S2 Fluid medium properties for different impact velocities**

Viscosity comparison for different samples milli-Q, 10% glycerol, LB solution, 0.6 wt.%, and 0.1 wt.% mucins (left) and Viscosity comparison of different fluids and spread factor comparison at different impact conditions (right). (Relates to **Figure 2A**)

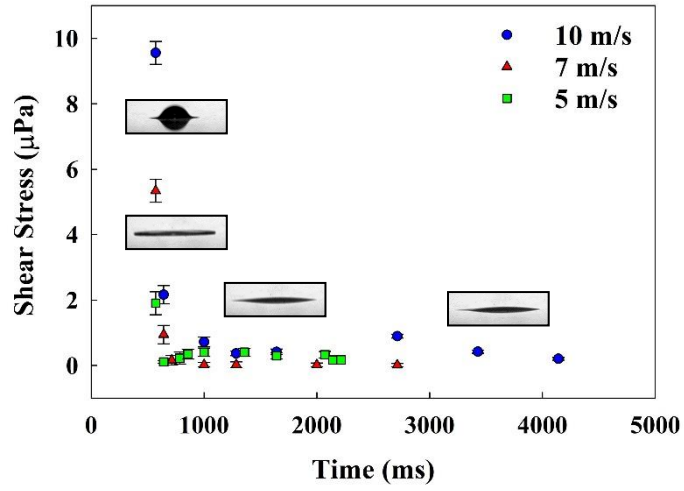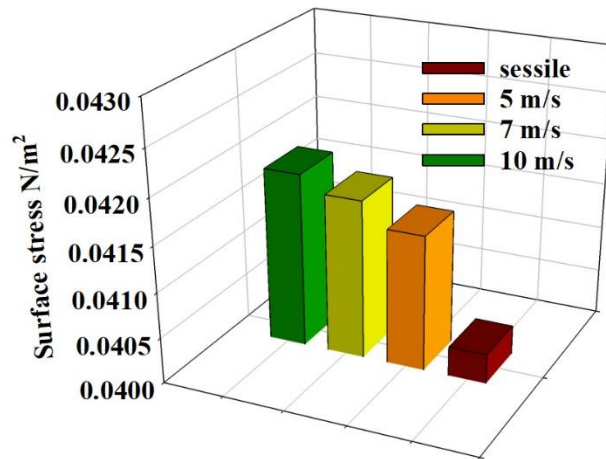

**Figure S3 Shear stress variation and surface stress experienced by AFM probe.**

The shear stress variation for the impacted sample on glass substrate (top) and surface stress experienced by the AFM probe on four different impact conditions with milli-Q as the base medium (bottom). (Relates to **Figure 2A, 2B, 2C, 2D**)

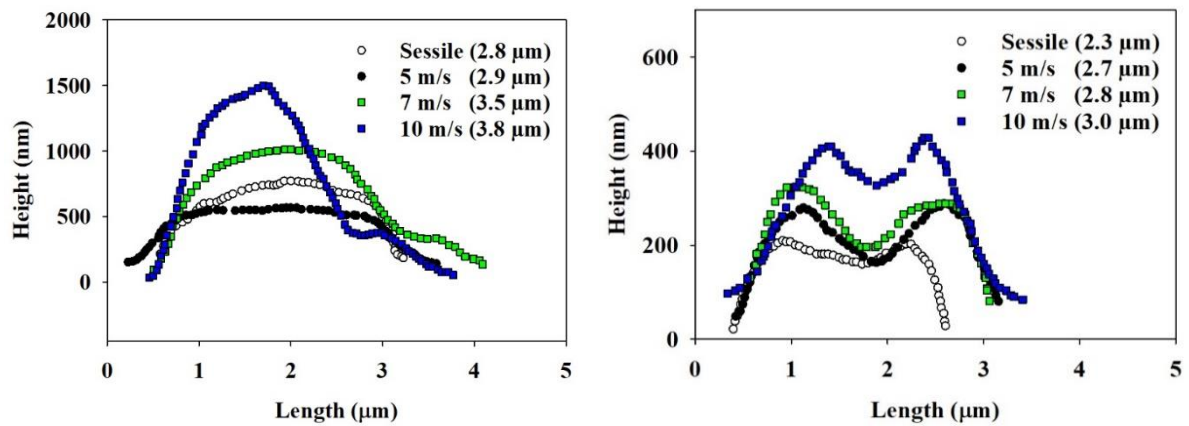

**Figure S4 Height and length profile of a random bacteria under different impact conditions.**

The height profile of *Salmonella* Typhimurium in milli-Q (left) and 0.6% mucin (right) subjected to different impact conditions. (Relates to **Figure 2E, 2F, 2H**)

## RAW264.7 macrophage cells

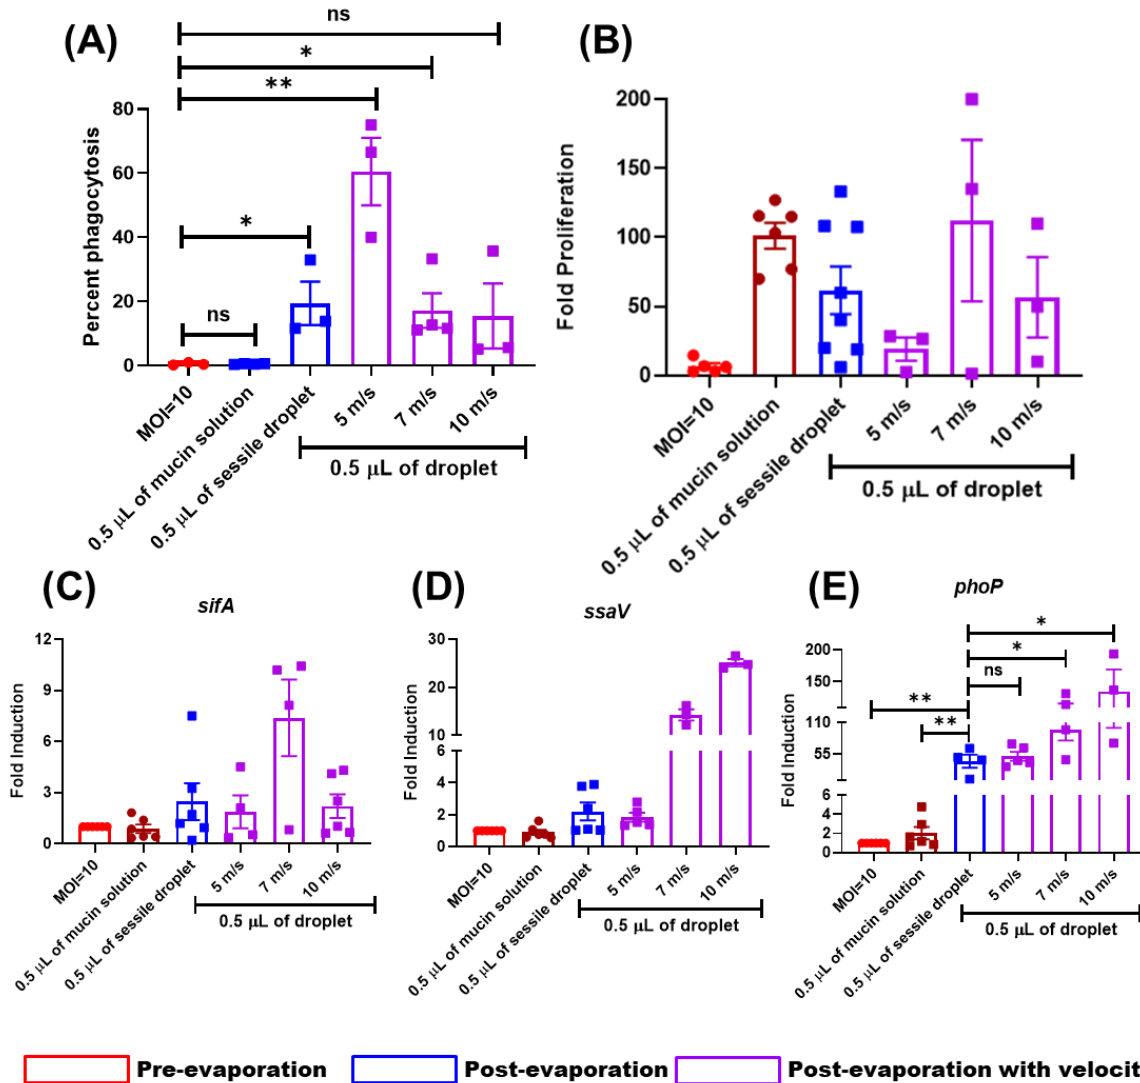

**Figure S5 The virulence of *Salmonella Typhimurium* retrieved from desiccated mucin droplet (0.6 wt%) impacted solid surface with or without velocities.**

*Salmonella Typhimurium* recovered from desiccated mucin (0.6 wt%) droplet impacted solid glass surface with or without specific velocities (5, 7, and 10 m/s) were used to infect RAW264.7 cells to determine the

(A) percent phagocytosis and (B) intracellular proliferation (n=3, N=2).

Determining the transcript-level expression of (C) *sifA*, (D) *ssaV* and (E) *phoP* from intracellular *Salmonella* by RT-qPCR (n=3, N=2).

Data are represented as mean  $\pm$  SEM. . (Relates to **Figure 4A-4E**)

(P) \* < 0.05, (P) \*\* < 0.005, (P) \*\*\* < 0.0005, (P) \*\*\*\* < 0.0001, ns= non-significant, (Student's t test-unpaired)
